# Supplementary material for: Antibiotic resistance evolved via inactivation of a ribosomal RNA methylating enzyme
Source: PubMed Central journal article supplement — Nucleic Acids Res. 2016 Aug 5;44(18):8897–907. doi: 10.1093/nar/gkw699 (PMC5062987; doi:10.1093/nar/gkw699), 2016-08-05
Supplement: supp_gkw699_20160803_Supplementary_Information_combined.pdf [file supp_gkw699_20160803_Supplementary_Information_combined.pdf]

## SUPPLEMENTARY INFORMATION

### Antibiotic resistance evolved via inactivation of a ribosomal RNA methylating enzyme

Vanja Stojković<sup>1</sup>, Lianet Noda-Garcia<sup>2</sup>, Dan S. Tawfik<sup>2\*</sup>, Danica Galonić Fujimori<sup>1,3\*</sup>

#### SUPPLEMENTARY FIGURES AND TABLES LEGENDS

Supplementary Figure S1. Antibiotics used in this study. Tiamulin, virginiamycin M<sub>1</sub>, chloramphenicol and clindamycin are PTC-targeting antibiotics. Streptomycin targets 30S subunit and trimethoprim inhibits dihydrofolate reductase.

Supplementary Figure S2. Tiamulin susceptibility test of Bsub\_RlmN evolved variants in *E. coli* BW25113 cells. Survival of the cells in the antibiotic environment is dependent on the expression of Bsub\_RlmN variants. Full expression of the enzyme is achieved at concentrations  $\geq 10$  ng/mL of AHT (1).

Supplementary Figure S3. Tiamulin susceptibility test of *S. aureus* Cfr in *E. coli* BW25113 cells. Each plate contained ampicillin for selection of the plasmid and AHT to induce the expression of the enzymes. Cells were plated at three concentrations, and plates were recorded after 24 hours. Abbreviations: Neg = empty pZA; WT = pZA\_WT\_Bsub\_RlmN; B = pZA\_BsubB; Cfr = pZA\_Saureus\_Cfr.

Supplementary Figure S4. HPLC analysis of the methylation products of the 2447-2625 rRNA fragment by Ecoli\_RlmN and Bsub\_RlmN. (a) <sup>14</sup>C radioactivity chromatogram of digested RNA isolated from the *in vitro* reaction with Bsub\_RlmN; (b) <sup>14</sup>C radioactivity chromatogram of digested RNA isolated from the *in vitro* reaction with Ecoli\_RlmN; (c) UV-Vis chromatogram of synthetic methyladenosine standards at 256 nm. 1. m<sup>2</sup>A; 2. m<sup>2</sup>m<sup>8</sup>A.

Supplementary Figure S5. *In vitro* methylation activity of Bsub\_RlmN WT and evolved variants towards potential tRNA substrates. A) WT Bsub\_RlmN is an rRNA-specific methylating enzyme and shows no *in vitro* activity towards several tRNA substrates of WT Ecoli\_RlmN as well as a non-substrate (tRNA\_G (CCC)). Reactions lacking the obligatory reductant, NADPH, serve as negative controls. B) Bsub\_RlmN evolved variants do not methylate tRNA\_D (GUC) and tRNA\_Q2 (UUG), two known substrates of WT Ecoli\_RlmN. *Error bars* (n  $\geq 2$ ), S.D.

Supplementary Figure S6. Dose-dependent antibiotic susceptibility test towards tiamulin. The plasmids expressing evolved variants were transformed into *E. coli* BW25113/ $\Delta$ rlmN cells, and the experiment was performed on agar plates. Each plate contained kanamycin for selection of the strain, ampicillin for selection of the plasmid and AHT to induce the expression of the enzymes. Cells were plated in three concentrations, and plates were recorded after 24 hours.

Supplementary Figure S7. *In vivo* methylation activity of BsubB towards 23S rRNA. MALDI-TOF mass spectrum of the C2480–C2520 fragment of *E. coli* 23S rRNA isolated from the *E. coli* BW25113/ $\Delta$ rlmN strain carrying an empty plasmid (A), or expressing WT Bsub\_RlmN (B), or BsubB variant (C), or *S. aureus* Cfr (D).

Supplementary Figure S8. Expanded phylogenetic tree of RlmN and Cfr sequences from selected Firmicutes species. The numbers correspond to the IMG/JGI database gene identifier. Letters A or B,

added after the scientific name, indicate the existence of paralogues in the specie. Experimentally validated Cfr enzymes were noted by adding term “Cfr” after their scientific names.

Supplementary Figure S9. *In vivo* methylation activity of CICp towards 23S rRNA. MALDI-TOF mass spectrum of the C2480–C2520 fragment of *E. coli* 23S rRNA isolated from the *E. coli* BW25113/ $\Delta$ *rlmN* strain expressing CICp.

Supplementary Table S1. List of all sequenced variants from the Bsub\_RlmN library with their mutagenic composition. The most predominant mutations in the library are S168C, G201D and A348T. Another highly representative mutation is C350S, a mutation of the catalytically active residue that usually appeared with S168C, G201D and A348T. In our initial antibiotic susceptibility experiments we tested an additional variant, BsubA, which contained S168C, G201D, A348T and C350S mutations. This variant was more susceptible to tiamulin than the other three variants studied in this paper.

Supplementary Table S2. Percentage of clones containing specific mutations after each round of evolution. The library was void of WT Bsub\_RlmN after the first round of evolution.

Supplementary Table S3. The MIC values of *E. coli* BW25113 and *E. coli* BW25113/ $\Delta$ *rlmN* cells harboring the plasmids determined by broth microdilution method. The numbers are an average of at least three independent experiments. Abbreviations: TIA = tiamulin; VIR M<sub>1</sub> = virginiamycin M<sub>1</sub>; CLI= clindamycin; CHL = chloramphenicol; STR = streptomycin; TMP = trimethoprim.

Supplementary Table S4. Ribosomal RNA methylating enzymes associated with antibiotic resistance in bacteria. a. Resistance conferred by the presence (+) or absence (-) of methylation; b. PhLOPS<sub>A</sub> phenotype includes resistance to phenicols, lincosamides, oxazolidinones, pleuromutilins, and streptogramin A antibiotics; c. MILS<sub>B</sub> phenotype indicates resistance to macrolides, lincosamides, and streptogramin B antibiotics; d. Selected examples of Erm mono- and dimethyltransferases.

## REFERENCES

1. Wellner, A., Raitses Gurevich, M. and Tawfik, D.S. (2013) Mechanism of protein sequence divergence and incompatibility. *PLoS genetics*, **9**, e1003665.

Supplementary Figure S1.

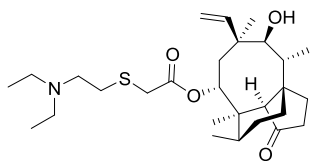

Tiamulin

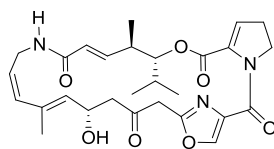

Virginiamycin M<sub>1</sub>

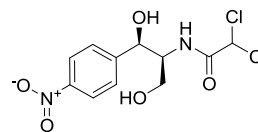

Chloramphenicol

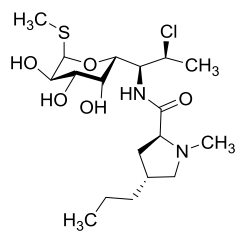

Clindamycin

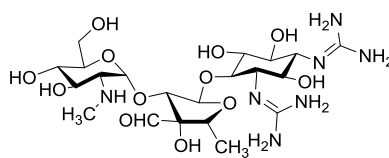

Streptomycin

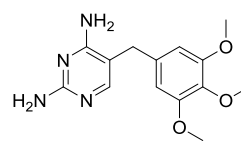

Trimethoprim

Supplementary Figure S2.

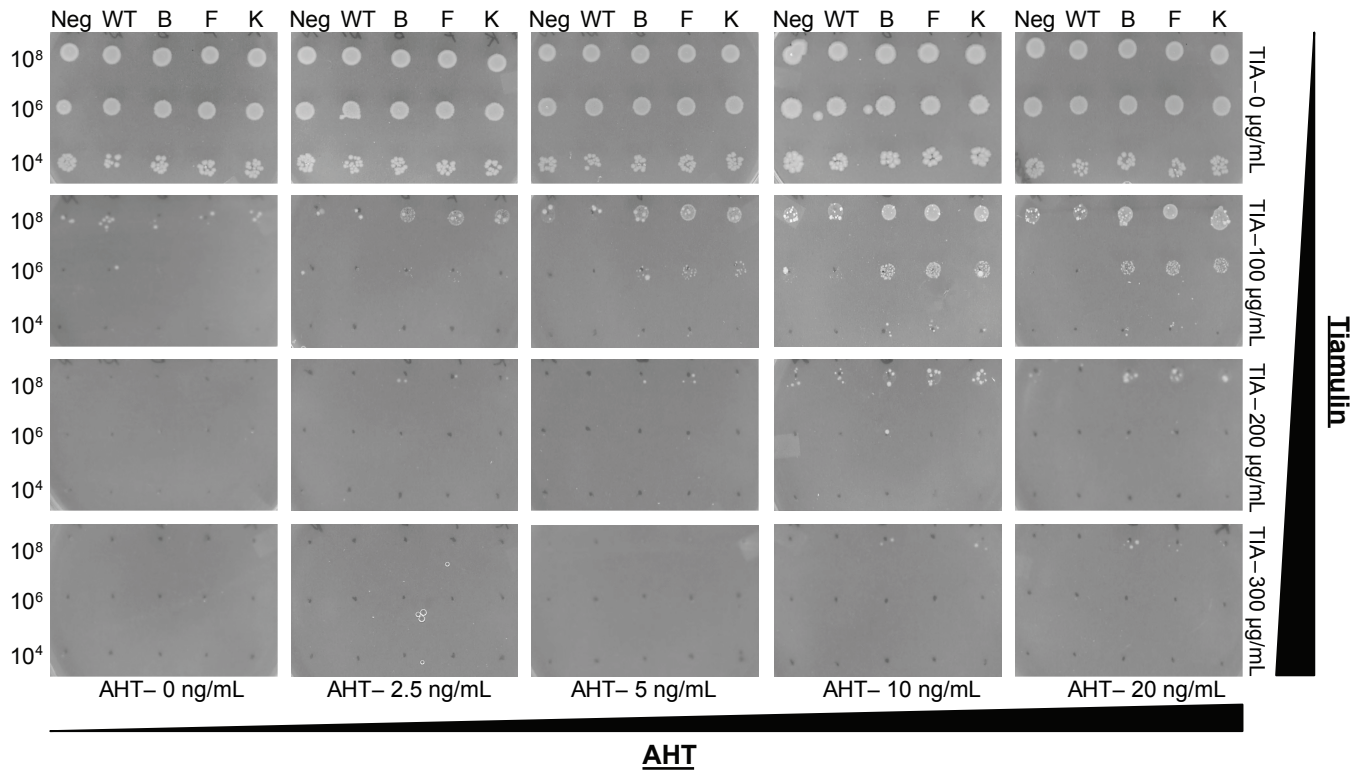



Supplementary Figure S4.

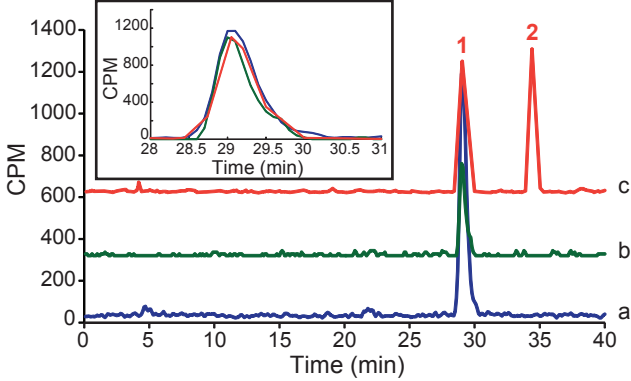

Supplementary Figure S5.

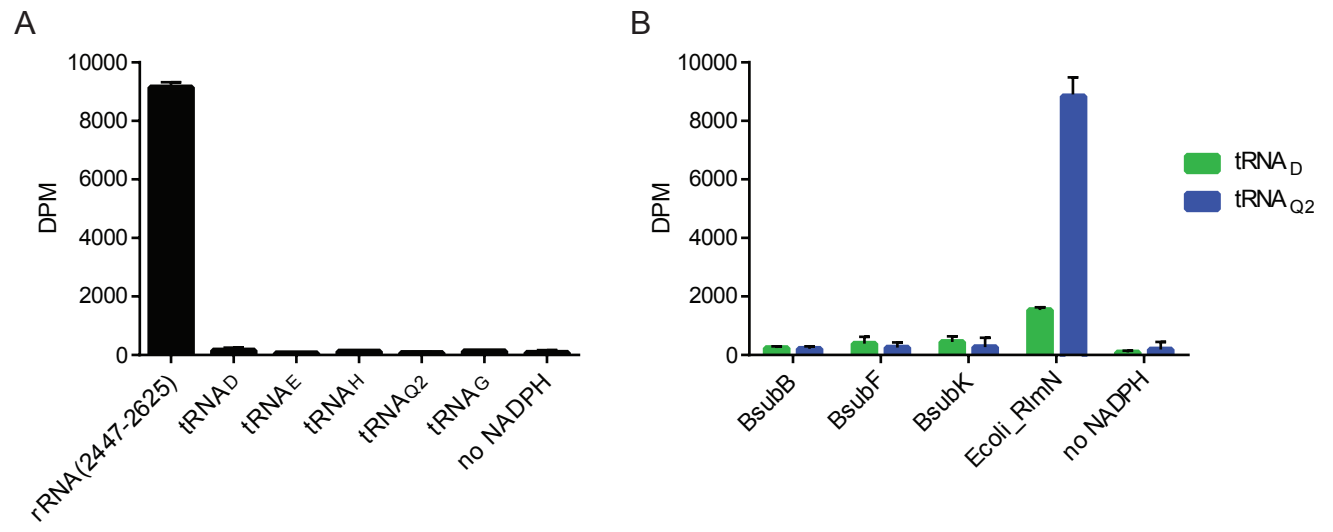

Supplementary Figure S6.

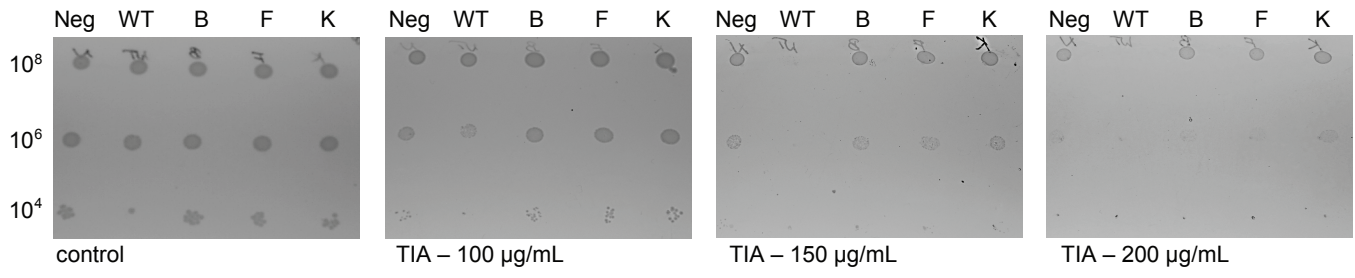



Supplementary Figure S7.

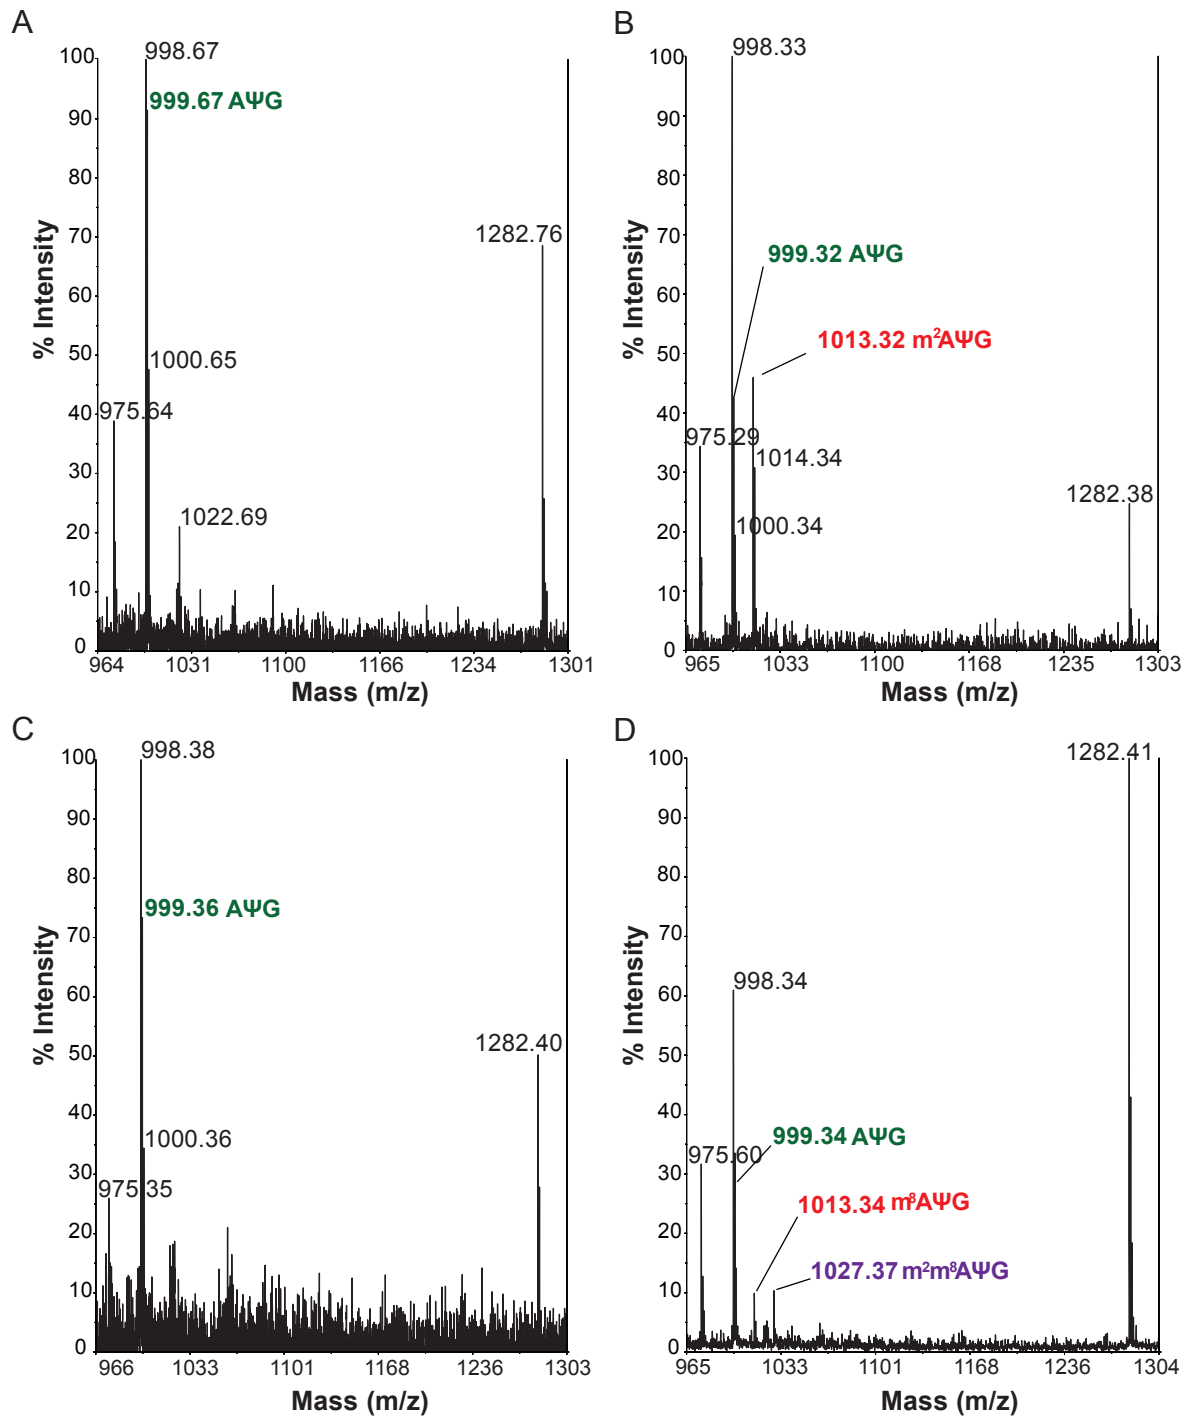

Supplementary Figure S8.

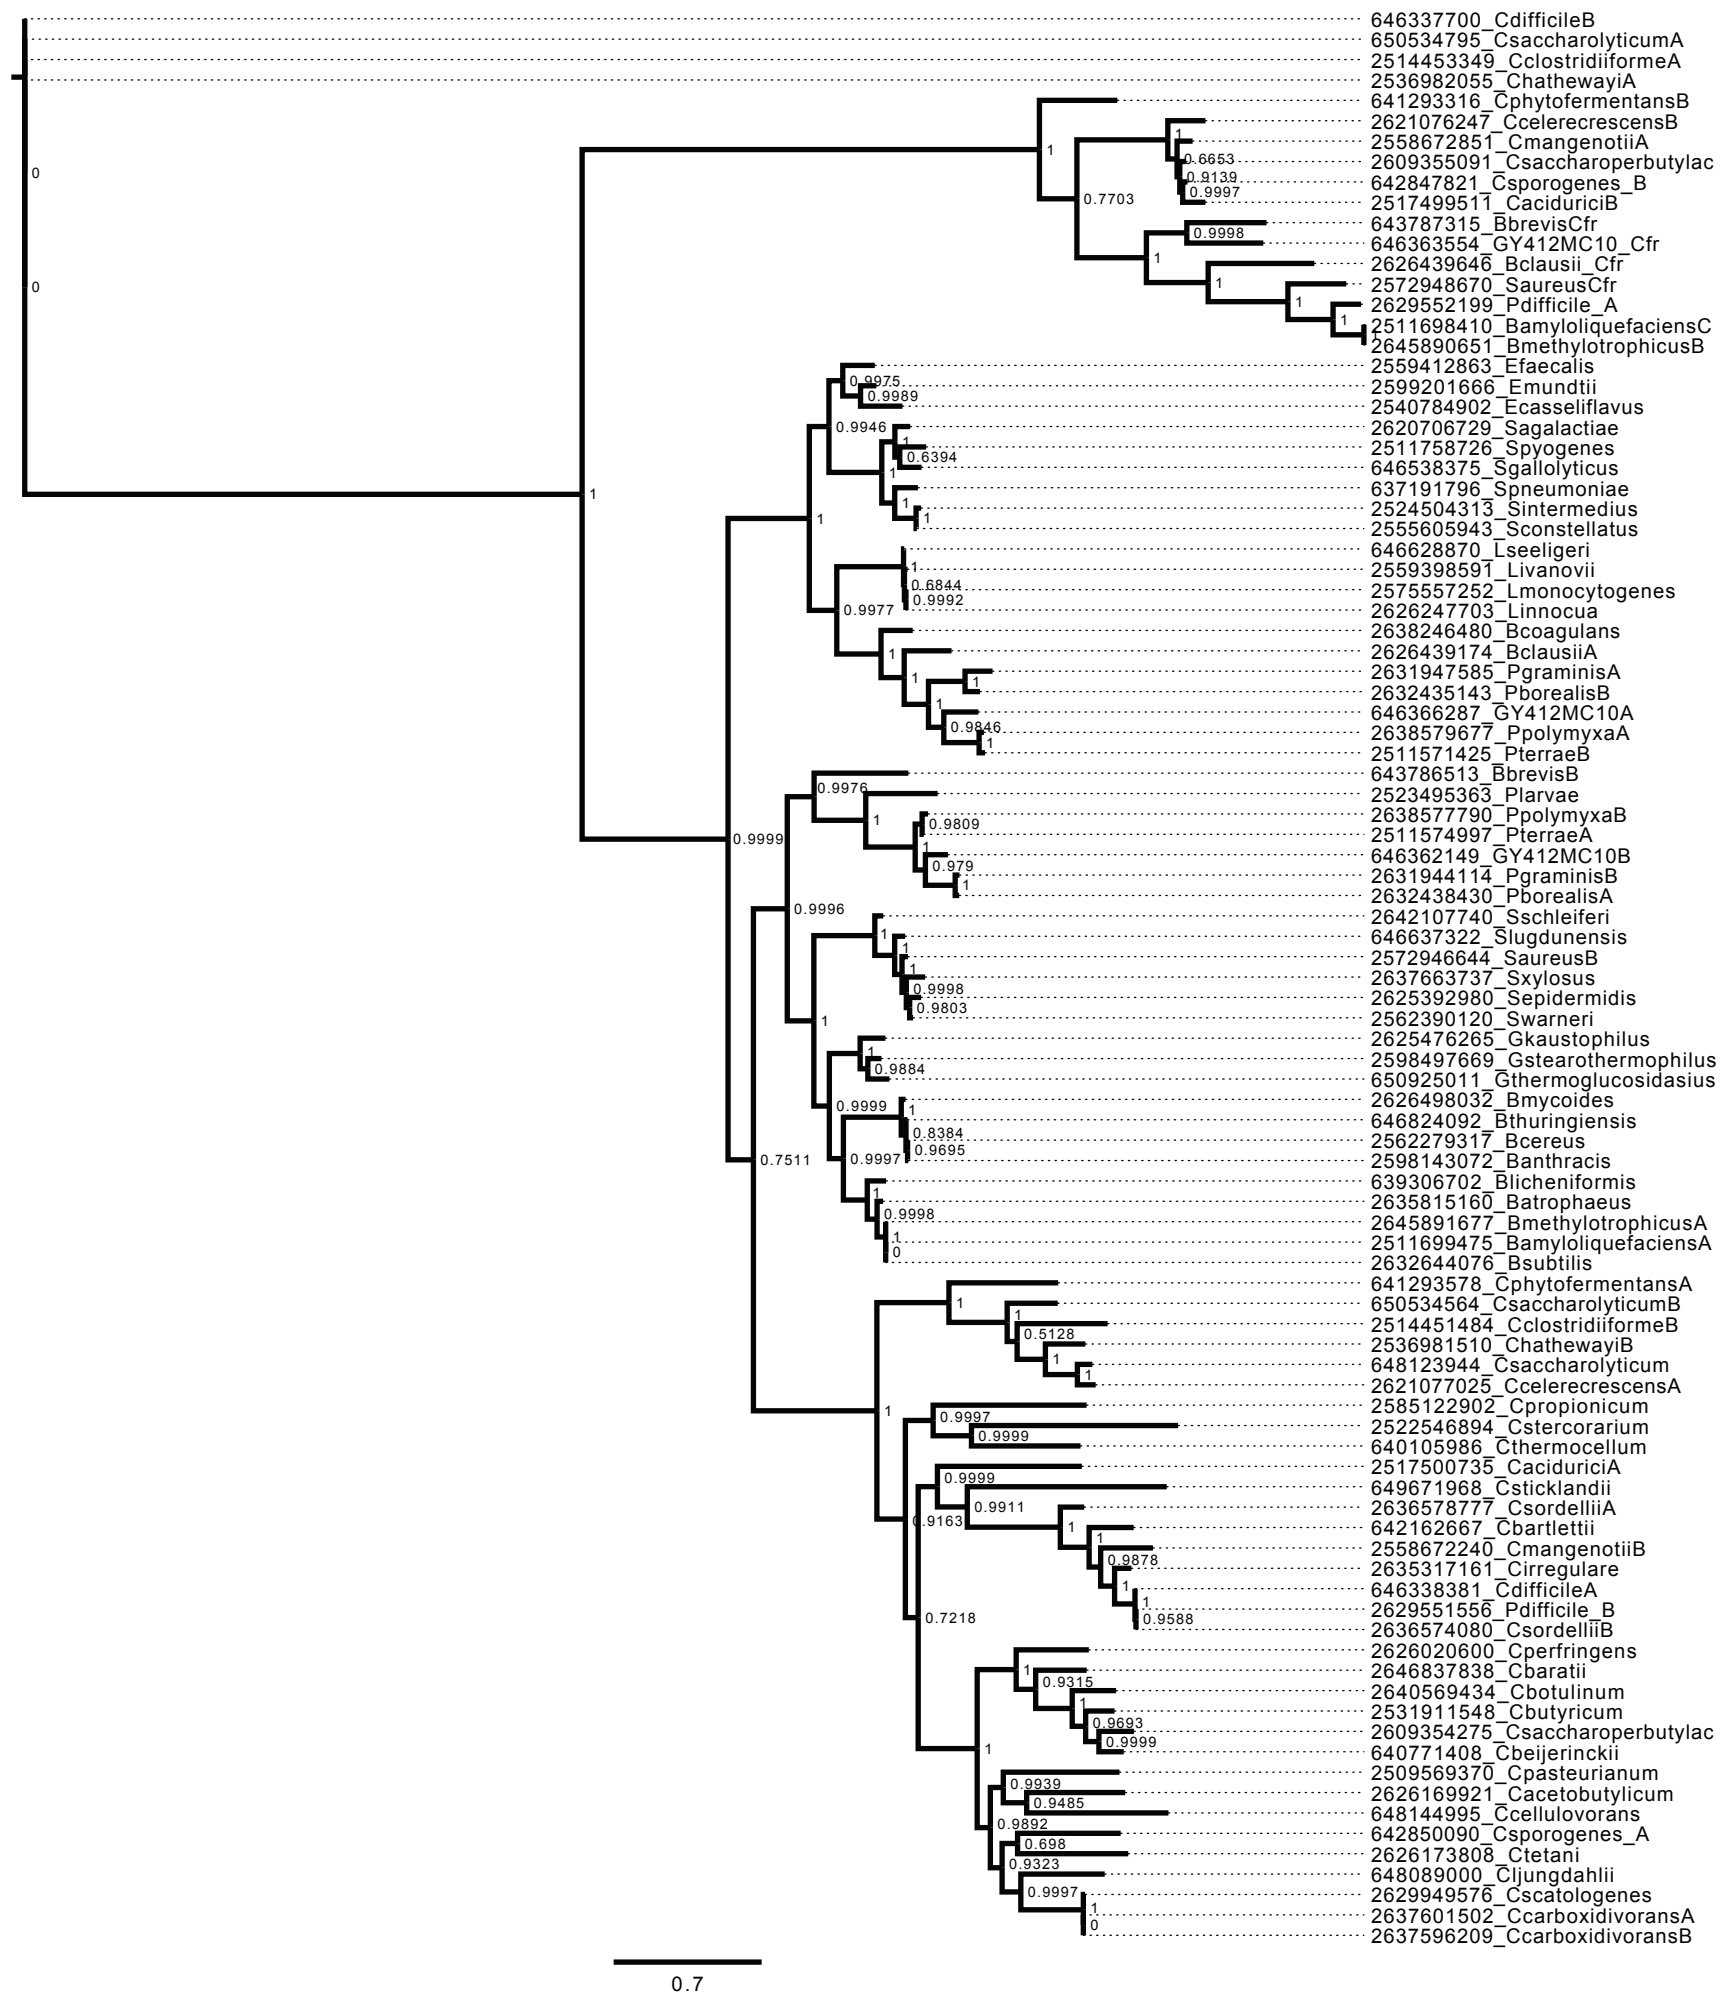

Supplementary Figure S9.

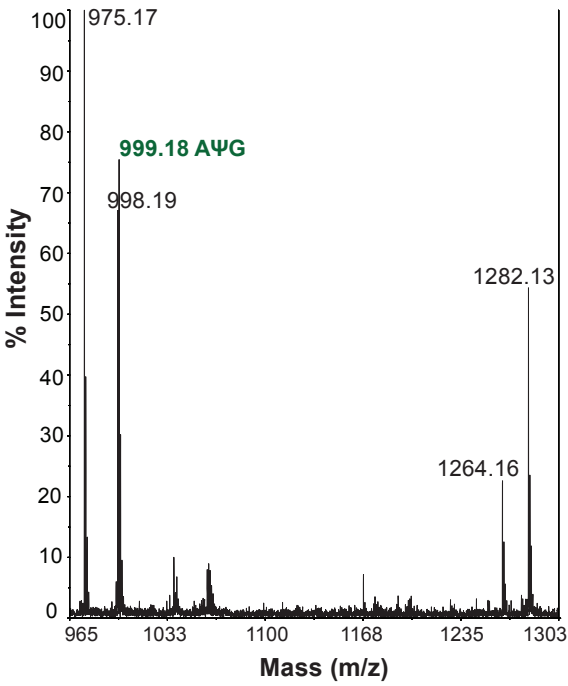

Supplementary Table S1.

| Round    | Concentration of tiamulin (µg/ml) | Clone number                                           | Mutations                                      |                     |
|----------|-----------------------------------|--------------------------------------------------------|------------------------------------------------|---------------------|
| Round #1 | 100                               | 1                                                      | N35S, L67Q, I128N                              |                     |
|          |                                   | 2                                                      | F188L, F219S, P245T                            |                     |
|          |                                   | 3                                                      | R242L, A348T, C350S                            |                     |
|          | 125                               | 1                                                      | S168C, G201D, A348T, C350S                     |                     |
|          |                                   | 2                                                      | S168C, G201D, A348T, C350S                     |                     |
|          |                                   | 3                                                      | S168C, G201D, A348T, C350S                     |                     |
|          |                                   | 4 (BsubB)                                              | S168C, G201D                                   |                     |
|          |                                   | 5                                                      | F132L, G139D, F179L, F323I                     |                     |
|          |                                   | 6                                                      | E16A, K155I, V280I, A348T, C350S               |                     |
|          |                                   | 7 (BsubB)                                              | S168C, G201D                                   |                     |
|          | Round #1 enrichment               | 100                                                    | 1                                              | S231F               |
|          |                                   |                                                        | 2 (BsubB)                                      | S168C, G201D        |
|          |                                   |                                                        | 3 (BsubK)                                      | S168C, G201D, A348T |
|          |                                   |                                                        | 4                                              | C130F, P245T, Q359K |
| 5        |                                   |                                                        | I128N, S168C, G201D, A348T, C350S              |                     |
| 125      |                                   | 1                                                      | G125D, G129D                                   |                     |
|          |                                   | 2 (BsubB)                                              | S168C, G201D                                   |                     |
|          |                                   | 3                                                      | S168C, G201D, V284M, R316S, Q321L, E341D       |                     |
|          |                                   | 4 (BsubB)                                              | S168C, G201D                                   |                     |
|          |                                   | 5 (BsubB)                                              | S168C, G201D                                   |                     |
| 6        | S168C, G201D, A348T, C350S        |                                                        |                                                |                     |
| 7        | S168C, G201D, A348T, C350S        |                                                        |                                                |                     |
| 8        | S168C, G201D, A348T, C350S        |                                                        |                                                |                     |
| 9        | S168C, G201D, A348T, C350S        |                                                        |                                                |                     |
| 10       | E16A, K155I                       |                                                        |                                                |                     |
| Round #2 | 150                               | 1 (BsubF)                                              | Q89R, G201D                                    |                     |
|          |                                   | 2 (BsubF)                                              | Q89R, G201D                                    |                     |
|          |                                   | 3 (BsubK)                                              | S168C, G201D, A348T                            |                     |
|          |                                   | 4                                                      | K38R, S168C, G201D, R340S                      |                     |
|          |                                   | 5                                                      | K141I, S168C, G201D, V280I                     |                     |
|          |                                   | 6                                                      | N35S, S117T, S168C, G201D, Q342H               |                     |
|          |                                   | 7                                                      | Q89R, I149N, F228L, A348T, C350S               |                     |
|          | 100                               | 1                                                      | T163M, S168C, G201D, F323L                     |                     |
|          |                                   | 2                                                      | E51D, I128M, A348T, C350S, R358C               |                     |
|          |                                   | 3                                                      | R127H, S168C, D320N, K330I, A348T, C350S       |                     |
|          |                                   | 4                                                      | G201D, G351S                                   |                     |
|          | 150                               | 1                                                      | S168C, S169F, A187V, G201D                     |                     |
|          |                                   | 2                                                      | A43T, D164N, Q222L, A348T, C350S               |                     |
|          |                                   | 3                                                      | A43T, S168C, H194Y, G201D, A234G, A348T, C350S |                     |
| 4        |                                   | E69K, T121M, I128M, S168C, T266S, Q342R                |                                                |                     |
| 175      | 1                                 | C126S, S168C, V259I, R316S, K327N, A348T, C350S        |                                                |                     |
|          | 2                                 | I128N, F188L, D195N, S208Y, N236D, V280I, A348T, C350S |                                                |                     |
|          | 3                                 | E98G, K155R, F228L, A348T, C350S                       |                                                |                     |
|          | 4                                 | I128M, S168C, G201D, P245T, D345G, A348T, C350S        |                                                |                     |

| Round    | Concentration of tiamulin (µg/mL) | Clone number | Mutations                                                                  |
|----------|-----------------------------------|--------------|----------------------------------------------------------------------------|
| Round #3 | 150                               | 1 (BsubB)    | S168C, G201D                                                               |
|          |                                   | 2            | T121M, S168C, N193I, G201D, I239T                                          |
|          |                                   | 3            | A83T, S168C, G201D, P214A, F323L, T337I, G351S                             |
|          |                                   | 4            | A134T, S168C, F179V, G201D, S271R, V280I, N335S                            |
|          |                                   | 5            | L186F, C350S                                                               |
|          |                                   | 6            | N35T, I128N, T131A, V167I, G176C, K190N, N193K, I120F, F228L, A348T, C350S |
|          |                                   | 7            | M137V                                                                      |
|          |                                   | 8            | F179V, S210R                                                               |
|          |                                   | 9            | E47K, T78S, I92V, G201D, I246L, F272V, P310H, T337S, A348T, C350S          |
|          |                                   | 10           | E69G, K85I, S117T, L137P, S168C, K196T, G201D, N247D, V309M                |
|          |                                   | 11           | L189M, P214Q, F228L, I239V, N307K, D347Y, A348T, C350S                     |
|          |                                   | 12           | I28F, I128N, S168C, A127T, V207I, G275R, R316H, A324S                      |
| Round #3 | 175                               | 1 (BsubB)    | S168C, G201D                                                               |
|          |                                   | 2            | T121A, G139D, S168C, G201D, D254E, G333E, E361D                            |
|          |                                   | 3            | V84A, S168C, G201D, Q222L, Q223E, D254E, R269C, P305S                      |
|          |                                   | 4            | S168C, G201D, F272I                                                        |
|          |                                   | 5            | A2T, V84A, I128M, F228L, S241G, N281Y                                      |
|          |                                   | 6            | D26Y, A83T, F227V, D345V, A348T, C350S                                     |
|          |                                   | 7            | Q30H, L96V, D195N, G201D, T206M, E341G                                     |
|          |                                   | 8            | P245T, A348T, C350S                                                        |
|          |                                   | 9            | E113K, N116S, C119R, G201D, K215I                                          |
|          |                                   | 10           | F23I, G36E, F46I, K81R, I128M, C130S, A249E                                |
|          |                                   | 11           | L25F, I128M, A159V, S168C, G201D, V280I, E288D, A348T, C350S               |
| Round #3 | 200                               | 1            | S168C, G201D, L293Y                                                        |
|          |                                   | 2            | E69G, K155N, S168C, G201D, K251R                                           |
|          |                                   | 3            | P39R, S168C, G201D, P318T                                                  |
|          |                                   | 4            | R166L, S168C, G201D                                                        |
|          |                                   | 5            | T136M, T328A, A348T, C350S                                                 |
|          |                                   | 6            | T15I, N35T, G201D, L353F                                                   |
|          |                                   | 7            | Q30H, L96V, I128M, D195N, G201D, E341G                                     |
|          |                                   | 8            | N5S, K38R, R127H, I128M, K155N, S168C, P235G, E257K, A348T, C350S          |
|          |                                   | 9 (BsubB)    | S168C, G201D                                                               |
|          |                                   | 10           | S168C, T337S, A348T, C350S                                                 |
|          |                                   | 11           | S88P, Q89R, G91D, S117T, V170I, V171L, G278R                               |

Supplementary Table S2.

| Mutation | % of clones<br>with specific<br>mutation |
|----------|------------------------------------------|------------------------------------------|------------------------------------------|------------------------------------------|
|          | Round #1                                 | Round #2                                 | Round #3                                 | Cumulative                               |
| Q89R     | 12 %                                     | 0 %                                      | 4 %                                      | 6 %                                      |
| S169C    | 54 %                                     | 50 %                                     | 62 %                                     | 57 %                                     |
| G201D    | 62 %                                     | 36 %                                     | 69 %                                     | 60 %                                     |
| A348T    | 39 %                                     | 57 %                                     | 31 %                                     | 39 %                                     |

Supplementary Table S3.

| Strain                                     | Plasmid             | MIC ( $\mu\text{g/mL}$ ) |                    |         |     |          |
|--------------------------------------------|---------------------|--------------------------|--------------------|---------|-----|----------|
|                                            |                     | TIA                      | VIR M <sub>1</sub> | CLI     | CHL | TMP      |
| BW25113                                    | pZA_empty           | 350-400                  | 300                | 150-200 | 8   | 0.5      |
|                                            | pZA_WT<br>Bsub_RlmN | 350-400                  | 300                | 150     | 8   | 0.25-0.5 |
|                                            | pZA_BsubB           | 500-550                  | 400                | 200     | 8   | 0.25-0.5 |
|                                            | pZA_BsubF           | 500-550                  | 400                | 150     | 8   | 0.25-0.5 |
|                                            | pZA_BsubK           | 500-550                  | 400                | 200     | 8   | 0.25-0.5 |
|                                            | pZA_Saureus<br>_Cfr | 800-1000                 | 800-1000           | 350-400 | 16  | 0.5      |
| BW25113/<br><i><math>\Delta</math>rlmN</i> | pZA_empty           | 400-450                  | 400                | 200-250 | 8   | 0.5      |
|                                            | pZA_WT<br>Bsub_RlmN | 250-300                  | 300                | 200     | 8   | 0.25-0.5 |
|                                            | pZA_BsubB           | 400-450                  | 400                | 200-250 | 8   | 0.25-0.5 |
|                                            | pZA_BsubF           | 400-450                  | 400                | 200-250 | 8   | 0.25-0.5 |
|                                            | pZA_BsubK           | 400-450                  | 400                | 200-250 | 8   | 0.25-0.5 |
|                                            | pZA_Saureus<br>_Cfr | 1200                     | >1200              | 350-400 | 16  | 0.25-0.5 |

Supplementary Table S4.

| Resistance methyltransferase gene         | Methylated nucleotides in <i>E. coli</i> numbering | Position of methylation | Methylation <sup>a</sup> | Target of the resistance gene | Antibiotic resistance phenotype                           |
|-------------------------------------------|----------------------------------------------------|-------------------------|--------------------------|-------------------------------|-----------------------------------------------------------|
| <i>aviRA</i>                              | G2535                                              | N1                      | +                        | 23S rRNA                      | Avilamycin                                                |
| <i>aviRb</i>                              | U2479                                              | 2'-O-ribose             | +                        | 23S rRNA                      | Avilamycin                                                |
| <i>cfr</i>                                | A2503                                              | C8                      | +                        | 23S rRNA                      | PhLOPS <sub>A</sub> <sup>b</sup><br>Hygromycin A<br>A201A |
| <i>emtA</i>                               | G2470                                              | N1                      | +                        | 23S rRNA                      | Evernimicin<br>Avilamycin                                 |
| <i>ermC<sup>d</sup> ermAM<sup>d</sup></i> | A2058                                              | N6,N6                   | +                        | 23S rRNA                      | MILS <sub>B</sub> <sup>c</sup>                            |
| <i>ermN<sup>d</sup> (tlrD)</i>            | A2058                                              | N6                      | +                        | 23S rRNA                      | Lincosamides                                              |
| <i>rlmA (tlrB)</i>                        | G748                                               | N1                      | +                        | 23S rRNA                      | Tylosin                                                   |
| <i>tsr</i>                                | A1067                                              | 2'-O-ribose             | +                        | 23S rRNA                      | Thiostrepton                                              |
| <i>armA, rmtA-rmtH</i>                    | G1405                                              | N7                      | +                        | 16S rRNA                      | Kanamycin<br>Gentamicin                                   |
| <i>npmA</i>                               | A1408                                              | N1                      | +                        | 16S rRNA                      | Neomycin                                                  |
| <i>rlmN</i>                               | A2503                                              | C2                      | -                        | 23S rRNA                      | Tiamulin<br>Virginiamycin M <sub>1</sub>                  |
| <i>rma</i>                                | G745                                               | N1                      | -                        | 23S rRNA                      | Viomycin                                                  |
| <i>tlyA</i>                               | C1920<br>C1409                                     | 2'-O-ribose             | -                        | 23S rRNA<br>16S rRNA          | Capreomycin<br>Viomycin                                   |
| <i>ksgA</i>                               | A1518 &<br>A1519                                   | N6,N6                   | -                        | 16S rRNA                      | Kasugamycin                                               |
| <i>rsmG</i>                               | G527                                               | N7                      | -                        | 16S rRNA                      | Streptomycin                                              |
